# Supplementary material for: Hydropriming and Biopriming Improve Medicago truncatula Seed Germination and Upregulate DNA Repair and Antioxidant Genes
Source: MDPI journal article supplement (doi:10.3390/genes11030242), 2020-02-25
Supplement: s1 [file s1]

Supplementary Material

# Hydropriming and biopriming improve *Medicago truncatula* seed germination and upregulate DNA repair and antioxidant genes

Chiara Forti<sup>1</sup>, Ajay Shankar<sup>2</sup>, Anjali Singh<sup>2</sup>, Alma Balestrazzi<sup>1</sup>, Vishal Prasad<sup>2</sup> and Anca Macovei<sup>1\*</sup>

<sup>1</sup>Department of Biology and Biotechnology 'L. Spallanzani', University of Pavia, via Ferrata 9, 27100-Pavia, Italy;

<sup>2</sup>Institute of Environment and Sustainable Development, Banaras Hindu University, Varanasi 221005, India;

\* Correspondence: anca.macovei@unipv.it; Tel.: +39-0382-985583

**Table 1.** List of oligonucleotides used for the *q*RT-PCR analysis. For each gene the Phytozome (<https://phytozome.jgi.doe.gov/pz/portal.html>) repository accession is indicated. The oligonucleotides were designed using Primer3 (<http://primer3.ut.ee/>) and subsequently checked for sequence specificity with NCBI BLAST ([https://blast.ncbi.nlm.nih.gov/Blast.cgi?PAGE\\_TYPE=BlastSearch](https://blast.ncbi.nlm.nih.gov/Blast.cgi?PAGE_TYPE=BlastSearch)) while primers physical characteristics were analysed using IDT OligoAnalyzer Tool (<https://eu.idtdna.com/pages/tools/oligoanalyzer>).

| Gene                           | Accession         | Forward primer (5'-3')     | Reverse primer (5'-3')     | Efficiency |
|--------------------------------|-------------------|----------------------------|----------------------------|------------|
| <i>OGG1</i>                    | Medtr3g088<br>510 | AAACACCGCACCTTCTCA<br>AT   | TGTGGAGATGTTTGAGGG<br>AA   | 1.73       |
| <i>FPG</i>                     | Medtr2g126<br>800 | TCCTTTCAATTCGGTATGG<br>C   | GCTCCAAACCATCGTCTA<br>GC   | 1.76       |
| <i>SOD</i>                     | Medtr7g114<br>240 | CCTGAGGATGAGACTCGA<br>CA   | GAACAACAACAGCCCTT<br>CCT   | 1.79       |
| <i>APX</i>                     | Medtr4g061<br>140 | AGCTCAGAGGTTTCATCG<br>CT   | CGAAAGGACCACCAGTC<br>TTT   | 1.76       |
| <i>MT2</i>                     | Medtr8g060<br>850 | CATGTCAAGCTCATGCGG<br>CAAC | TGCCGTAGTTGTTTCCCTT<br>CCC | 1.72       |
| <i>ACT</i>                     | Medtr3g095<br>530 | TCAATGTGCCTGCCATGT<br>ATG  | ACTCACACCGTCACCAG<br>AATC  | 1.70       |
| <i>TUB</i>                     | Medtr7g089<br>120 | TTTGCTCCTCTTACATCCC<br>GTG | GCAGCACACATCATGTTT<br>TTGG | 1.82       |
| <i>UBI</i>                     | Medtr3g091<br>400 | GCAGATAGACACGCTGG<br>GA    | AACTCTGGGCAGGCAA<br>TAA    | 1.81       |
| <i>GADPH</i>                   | Medtr3g085<br>850 | TGCCTACCGTCGATGTTTC<br>AGT | TTGCCCTCTGATTCCTCCT<br>TG  | 1.75       |
| <i>ELF1<math>\alpha</math></i> | Medtr6g021<br>800 | GACAAGCGTGTGATCGAG<br>AGA  | TTTCACGCTCAGCCTTAA<br>GCT  | 1.69       |

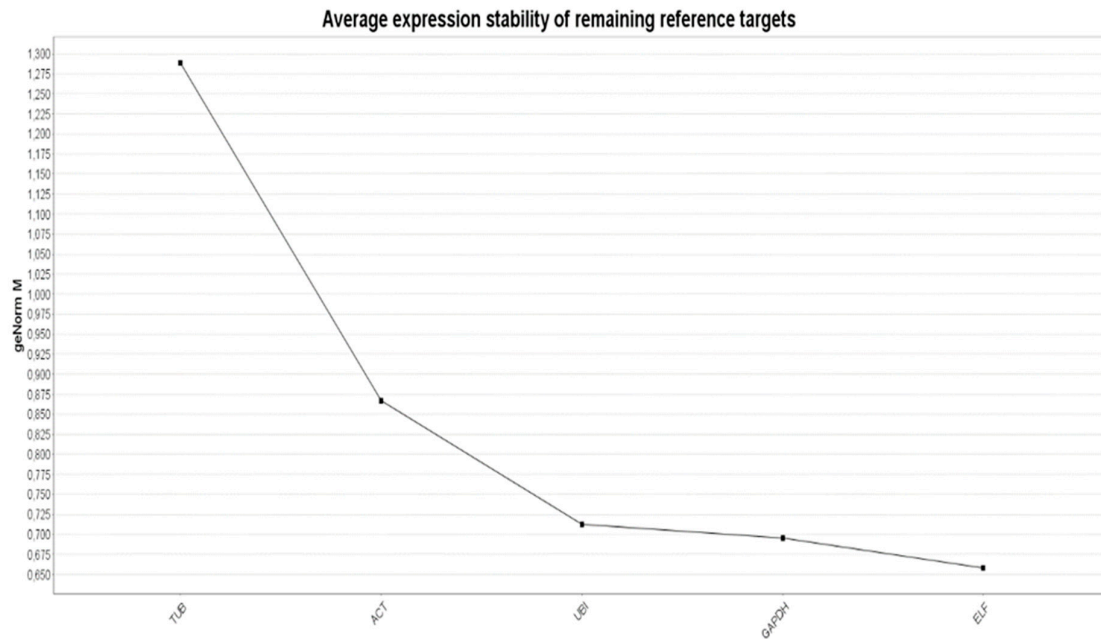

**Figure 1.** geNorm analysis of reference genes. geNorm is a popular algorithm (<https://genorm.cmgg.be/>) used to determine the most stable reference genes from a set of tested candidate reference. Here, we used the tubulin (*TUB*), actin (*ACT*), ubiquitin (*UBI*), glyceraldehyde-3-phosphate dehydrogenase (*GAPDH*) and elongation factor 1 $\alpha$  (*ELF*) genes. The gene expression normalization factor (geNorm M) was calculated for each sample based on the geometric mean of the reference genes. The cDNA extracted from seedlings grown from primed and non-primed seeds was used for this analysis. The most stable genes, presenting the lowest geNorm M, were identified as *GAPDH* and *ELF*, and were subsequently used for *qRT-PCR* data normalization, as indicated in Materials & Methods.
